1                                   **Dementia is Associated with a Syndrome**  
2                                   **of Global Neuropsychiatric Disturbance**

3  
4

**Donald R. Royall, M.D.**

Departments of Psychiatry, Medicine,  
and Family and Community Medicine,  
and the Biggs Institute for Alzheimer's  
and Neurodegenerative Disorders at  
the University of Texas Health Science  
Center, San Antonio, TX  
TEL: (210) 567-1255, FAX:(210) 567-  
1269 [royall@uthscsa.edu](mailto:royall@uthscsa.edu)

**Raymond F. Palmer, Ph.D.**

Department of  
Family and Community Medicine,  
the University of Texas Health Science  
Center, San Antonio, TX  
TEL: (210) 358-3883,  
[palmerr@uthscsa.edu](mailto:palmerr@uthscsa.edu)

5 **and the Alzheimer's Disease Neuroimaging Initiative\***

6

7 \*Some data used in preparation of this article were obtained from the Alzheimer's  
8 Disease Neuroimaging Initiative (ADNI) database ([adni.loni.usc.edu](http://adni.loni.usc.edu)). ADNI had no role  
9 in study design, data collection and analysis, decision to publish, or preparation of the  
10 manuscript. However, ADNI investigators contributed to the design and implementation  
11 of ADNI and/or provided data. A complete listing of ADNI investigators can be found at:  
12 [http://adni.loni.usc.edu/wp-](http://adni.loni.usc.edu/wp-content/uploads/how_to_apply/ADNI_Acknowledgement_List.pdf)  
13 [content/uploads/how\\_to\\_apply/ADNI\\_Acknowledgement\\_List.pdf](http://adni.loni.usc.edu/wp-content/uploads/how_to_apply/ADNI_Acknowledgement_List.pdf).

14

15

16

17 Key words: BPSD, Cognition, Dementia, Functional Status, *g*, intelligence

18

19

20 \*Corresponding Author:

21

22 \*Donald R. Royall, M.D.

23 Department of Psychiatry  
24 University of Texas Health Science Center at San Antonio  
25 7703 Floyd Curl Dr.  
26 San Antonio, TX 78229-3900  
27 TEL: (210) 567-1255  
28 FAX:(210) 567-1269  
29 Email: [royall@uthscsa.edu](mailto:royall@uthscsa.edu)

30

31 **Acknowledgments:**

32 This work was supported by the Julia and Vann Buren Parr endowment for the  
33 study of Alzheimer's Disease. The funders had no role in study design, data  
34 collection and analysis, decision to publish, or preparation of the manuscript.

35  
36 Some data used in preparation of this article were obtained from the ADNI  
37 database ([adni.loni.usc.edu](http://adni.loni.usc.edu)). Data collection and sharing for this project was  
38 funded by the Alzheimer's Disease Neuroimaging Initiative (ADNI) (National  
39 Institutes of Health Grant U01 AG024904) and DOD ADNI (Department of  
40 Defense award number W81XWH-12-2-0012). ADNI is funded by the National  
41 Institute on Aging, the National Institute of Biomedical Imaging and  
42 Bioengineering, and through generous contributions from the following: AbbVie,  
43 Alzheimer's Association; Alzheimer's Drug Discovery Foundation; Araclon  
44 Biotech; BioClinica, Inc.; Biogen; Bristol-Myers Squibb Company; CereSpir, Inc.;  
45 Cogstate; Eisai Inc.; Elan Pharmaceuticals, Inc.; Eli Lilly and Company;  
46 EuroImmun; F. Hoffmann-La Roche Ltd and its affiliated company Genentech,  
47 Inc.; Fujirebio; GE Healthcare; IXICO Ltd.; Janssen Alzheimer Immunotherapy  
48 Research & Development, LLC.; Johnson & Johnson Pharmaceutical Research  
49 & Development LLC.; Lumosity; Lundbeck; Merck & Co., Inc.; Meso Scale  
50 Diagnostics, LLC.; NeuroRx Research; Neurotrack Technologies; Novartis  
51 Pharmaceuticals Corporation; Pfizer Inc.; Piramal Imaging; Servier; Takeda  
52 Pharmaceutical Company; and Transition Therapeutics. The Canadian Institutes  
53 of Health Research is providing funds to support ADNI clinical sites in Canada.  
54 Private sector contributions are facilitated by the Foundation for the National  
55 Institutes of Health ([www.fnih.org](http://www.fnih.org)). The grantee organization is the Northern  
56 California Institute for Research and Education, and the study is coordinated by  
57 the Alzheimer's Therapeutic Research Institute at the University of Southern  
58 California. ADNI data are disseminated by the Laboratory for Neuro Imaging at  
59 the University of Southern California.

60  
61  
62 This analysis has been presented as an abstract at the Gerontological Society of

63 America's 71st Annual Scientific Meeting in Austin, Texas on November 16, 2019.

64

65 **Abstract: (268 words)**

66

67 **Objective:** Global factors have been identified in measures of cognitive performance  
68 (i.e., Spearman's  $g$ ) and psychopathology (i.e., "General Psychopathology", " $p$ ").  
69 Dementia is also strongly determined by the latent phenotype " $\delta$ ", derived from  $g$ . We  
70 wondered if the Behavior and Psychological Symptoms of Dementia (BPSD) might arise  
71 from an association between  $\delta$  and  $p$ .

72 **Methods:**  $\delta$  and  $p$  were constructed by confirmatory factor analyses in data from the  
73 Alzheimer's Disease Neuroimaging Initiative (ADNI).  $\delta$  and orthogonal factors  
74 representing "domain-specific" variance in memory (MEM) and executive function (EF)  
75 were regressed onto  $p$  and orthogonal factors representing "domain-specific" variance in  
76 positive (+) and negative (-) symptoms rated by the Neuropsychiatric Inventory Nursing  
77 Home Questionnaire (NPI-Q) by multiple regression in a structural equation model  
78 (SAM) framework.

79 **Results:** Model fit was excellent (CFI = 0.98, RMSEA = 0.03).  $\delta$  was strongly associated  
80 with  $p$ , (+) and (-) and strongly associated with  $p$  ( $r = -0.57$ ,  $p < 0.001$ ). All three  
81 associations were inverse (adverse). Independently of  $\delta$ , MEM was uniquely associated  
82 with (+), while ECF was associated with (-). Both associations were moderately strong.  
83 ECF was also weakly associated with  $p$ .

84 **Conclusions:** Dementia severity ( $\delta$ ) derived from general intelligence ( $g$ ) is specifically  
85 associated with general psychopathology ( $p$ ). This is  $p$ 's first demonstration in an elderly  
86 sample and the first to distinguish the global behavioral and psychological symptoms  
87 *specific to dementia* (BPSSD) from behavioral disturbances arising by way of non-  
88 dementing, albeit likely disease-specific, processes affecting domain-specific cognitive  
89 and behavioral constructs. Our findings call into question the utility of proposed regional

90 interventions in BPSSD, and point to the need to explore global interventions against

91 dementia-specific behavioral features.

92

93

94

95 **Introduction:**

96

97 The so-called Behavioral and Psychological Symptoms of Dementia (BPSD) are a major  
98 source of comorbidity and caregiver burden (1). BPSD increase exposure to  
99 psychopharmacological agents and their associated adverse drug reactions (ADR) (2).  
100 They are a major factor in caregiver stress (3-4), increase the risk of institutionalization  
101 (5) and inflate the costs associated with dementia care (3).

102

103 Regardless, surprisingly little is known about the biological substrates of BPSD, their  
104 natural history or risk factors. It is widely assumed that BPSD arise from the regional  
105 neuropathology(ies) specific to the disease(s) in which they develop. Some investigators  
106 have attempted to use BPSD to develop etiologically precise BPSD signatures.  
107 However, in young adults, a global “general psychopathology” factor “ $p$ ” has been  
108 proposed to influence all psychopathological behavioral domains (6-7) and is  
109 demonstrable in a wide range of conditions (8).

110

111  $p$  has never been addressed in the context of dementia and BPSD. However, it  
112 recapitulates Spearman’s well-accepted general intelligence factor “ $g$ ” (9). Our recent  
113 work strongly implicates  $g$  as the essential cognitive determinant of dementia severity  
114 (10). Only via  $g$  can cognitive performance be meaningfully related to functional status.  
115 We have demonstrated this via theory-driven bi-factor confirmatory analyses (CFA) in a  
116 Structural Equation Model (SEM) framework (11-12). The resulting latent variable “ $\delta$ ” (for  
117 “dementia”) is strongly associated with the Clinical Dementia Rating Scale (CDR) “Sum  
118 of boxes” (CDR-SB) (13), cross-sectionally (14), longitudinally (15-16), and across  
119 diagnoses (16).

120

121  $\delta$  is highly accurate in distinguishing demented cases (16), but it is entirely “agnostic” as  
122 to dementia’s etiology (17). If  $p$  can be shown to be associated specifically with  $\delta$  then it  
123 would directly implicate dementia *itself* as the transdiagnostic determinant of global  
124 psychopathology, link  $p$  to intelligence, and constrain  $p$ ’s biology to that of  $g$  and  $\delta$ .

125

126 Conversely, “domain-specific” variance in cognitive performance (i.e., “memory”, “frontal  
127 lobe functions”, etc.) is “orthogonal” (unrelated) to  $g$  (11-12). It therefore risks to be  
128 unrelated to both  $\delta$  and IADL, and thus to be independent of dementia *per se*. In this  
129 study, we test the fit of  $p$  to BPSD reported participants in the Texas Alzheimer’s  
130 Research and Care Consortium (TARCC) and relate cognitive performance, including  $\delta$   
131 and orthogonal domain-specific factors, to prospective variance in  $p$  and orthogonal  
132 domain-specific behavioral clusters.

133

134 **Methods:**

135

136 Subjects:

137

138 Subjects included  $n = 3385$  participants in the Texas Alzheimer’s Research and Care  
139 Consortium (TARCC). The Consortium’s methods have been described in detail  
140 elsewhere (18). Briefly, the TARCC cohort is a convenience sample of well-  
141 characterized cases of Alzheimer’s disease (AD) ( $n = 1240$ ), “Mild Cognitive Impairment  
142 “(MCI) ( $n = 688$ ), and normal controls (NC) ( $n = 1384$ ). Each TARCC participant  
143 undergoes a standardized annual examination that includes a medical evaluation,  
144 neuropsychological testing, and clinical interview. Diagnosis of AD is based on National  
145 Institute for Neurological Communicative Disorders and Stroke-Alzheimer’s Disease and  
146 Related Disorders Association (NINCDS-ADRDA) criteria. All TARCC evaluations and

147 psychometrics are provided in English or in Spanish according to the subject's  
148 preference. Institutional Review Board approval was obtained at each site and written  
149 informed consent was obtained for all participants.

150

151 **Statistical Analyses:**

152

153 This analysis was performed using Analysis of Moment Structures (AMOS) software  
154 (19). The maximum likelihood estimator was chosen. Co-variances between the  
155 residuals were estimated if they were significant and improved fit.

156

157 Neuropsychiatric Indicators:

158

159 *The Neuropsychiatric Inventory (NPIQ) (20):* Behavioral and neuropsychiatric  
160 disturbances were measured at Wave 2 by the informant-rated NPI-Q. Multiple Spanish  
161 translations are available. We used the Spanish version generated by the Spanish  
162 Translation and Adaptation Work Group (STAWG) from the National Alzheimer's  
163 Coordinating Center (NACC) Uniform Data Set (UDS) (21). This scale has been well-  
164 validated among Mexican American (MA) respondents (22).

165

166 The NPI-Q encompasses 12 behavioral features that are commonly exhibited in the  
167 context of neuropsychiatric illness. For this study, a modified NPIQ was administered by  
168 an experienced research assistant to knowledgeable informants (caregivers), who were  
169 asked to rate the presence and the severity of each BPSD, i.e., agitation/aggression,  
170 dysphoria/depression, irritability/lability, apathy/indifference, anxiety, disinhibition,  
171 aberrant motor behavior, delusions, hallucinations, euphoria/ elation, nighttime  
172 behavioral disturbances, and appetite/eating disturbances.

173

174 Informants were first asked to endorse the presence or absence of each BPSD over the  
175 prior four weeks, using a single screening question. If the informant endorsed the  
176 behavior, a severity score was assigned on a three-point Likert scale (i.e., 1-mild, 2-  
177 moderate, 3-severe). If the informant did not endorse a behavior, its “severity” was rated  
178 “zero”. Thus, in our modified adaptation, each NPI-rated BPSD ranged from zero (not  
179 endorsed) to 3 “severe”. The total NPI-Q severity score represents the sum of the 12  
180 individual modified symptom severity scores and ranges from 0 to 36 (NPI-QTOT).

181

182 Covariates:

183 All observed measures in the structural models were adjusted for baseline age, body  
184 mass index (BMI), education, ethnicity, gender, Mini-Mental Status Exam (MMSE) score  
185 (23), **HcY, and HgbA1c.**

186

187 Age: Self-reported age was confirmed by birthdate and coded continuously.

188

189 Body Mass Index (BMI): BMI was estimated as the ratio of subject height to weight  
190 (REF).

191

192 Education: Education was coded continuously as years of formal education.

193

194 Ethnicity: Ethnicity was determined by self-report and coded dichotomously as  
195 “Hispanic” = 1 and “non-Hispanic White” (NHW) = 0.

196 Gender: Gender was coded dichotomously with “female” = 1.

197



198 The Clinical Dementia Rating Scale sum of boxes (CDR-SB) (24): The Clinical Dementia  
199 Rating Scale “sum of boxes (CDR-SB) (13) The CDR is used to evaluate dementia  
200 severity. The rating assesses the patient’s cognitive ability to function in six domains –  
201 memory, orientation, judgment and problem solving, community affairs, home and  
202 hobbies and personal care. Information is collected during an interview with the patient’s  
203 caregiver. Optimal CDR-SB ranges corresponding to global CDR scores are 0.5 - 4.0 for  
204 a global score of 0.5, 4.5 - 9.0 for a global score of 1.0, 9.5 - 15.5 for a global score of  
205 2.0, and 16.0 - 18.0 for a global score of 3.0.

206

207 The Geriatric Depression Rating Scale (GDS) (25): GDS scores range from zero-30.  
208 Higher scores are worse. A cut-point of 9-10 best discriminates clinically depressed from  
209 non-depressed elderly.

210

211 The Mini-Mental Status Examination (MMSE) (23): The MMSE is a well-known and  
212 widely used test for cognitive impairment screening. Scores range from 0 to 30. Scores  
213 less than 24 reflect cognitive impairment.

214

215 *Analysis Sequence:*

216

217 The NPI-Q items’ severity ratings were submitted to a CFA in SEM. First, a latent  
218 variable “ $p$ ” was derived from all 12 BPSD. Orthogonal latent factors rating “positive” (+)  
219 and negative (-) domain-specific symptom clusters were constructed from  $p$ ’s residuals.  
220 This renders (+) and (-) “orthogonal” (unrelated) to  $p$  because their respective indicators  
221 are already adjusted for that global construct. The result is a “bifactor” CFA model  
222 defining  $p$  and two orthogonal domain-specific factors, (+) and (-) (**Figure 1**).

223

224 The bifactor model's fit was compared to several alternatives, beginning with the single  
225 factor  $p$ . In a second alternative, (+) and (-) were used as  $p$ 's indicators, resulting in a  
226 hierarchical model. Finally, all three models containing  $p$  were compared to a previously  
227 described four factor model which lacked this construct. It was developed by an  
228 exploratory factor analysis of NPI-Q data (26). All four alternative models were  
229 constructed from NPI-Q data collected at wave 2.

230

231 The best fitting model was associated with cognitive performance data collected at wave  
232 1 in TARCC (baseline). Now, cognitive performance data were submitted to a four factor  
233 CFA as previously described (12). This results in the "dDx"  $\delta$  homolog, and three  
234 orthogonal factors, i.e.,  $g'$  (dDx's residual in Spearman's  $g$ ) and two domain-specific  
235 cognitive factors rating memory (MEM) and executive function (EF). In TARCC, the dDx  
236 homolog has been reported to have a high area under the receiver operating  
237 characteristic curve (AUC /ROC) for Alzheimer Disease's (AD)'s discrimination from  
238 normal controls (NC) ( $c = 0.98$ ) and to be strongly associated with dementia severity as  
239 measured by the CDR-SB ( $r = 0.88$ ).

240

241 dDx, MEM and EF at wave 1 were regressed onto wave 2  $p$ , (+) and (-) by multivariate  
242 regression in a structural SEM framework. The result is a multivariate regression model  
243 of the baseline cognitive factors as predictors of prospective global and domain-specific  
244 BPSD (**Figure 2**).

245

246 *Missing data:*

247 We used the newest instance of TARCC's dataset (circa 2016). The entire dataset was  
248 employed. Clinical diagnoses were available on 3385 subjects, 2861 of whom had  
249 complete data for  $\delta$ 's cognitive indicators and covariates. Modern Missing Data Methods

250 were automatically applied by the AMOS software (27). AMOS employs Full information  
251 Maximum Likelihood (FIML) (28).

252

253 *Fit indices:*

254 Fit was assessed using four common test statistics: chi-square, the ratio of the chisquare  
255 to the degrees of freedom in the model (CMIN /DF), the comparative fit index (CFI), and  
256 the root mean square error of approximation (RMSEA). A non-significant chisquare  
257 signifies that the data are consistent with the model (29). However, in large samples, this  
258 metric conflicts with other fit indices (insensitive to sample size) show that the model fits  
259 the data very well. A CMIN/DF ratio < 5.0 suggests an adequate fit to the data (30).The  
260 CFI statistic compares the specified model with a null model (31). CFI values range from  
261 0 to 1.0. Values below 0.95 suggest model misspecification. Values approaching 1.0  
262 indicate adequate to excellent fit. An RMSEA of 0.05 or less indicates a close fit to the  
263 data, with models below 0.05 considered “good” fit, and up to 0.08 as “acceptable“(32).  
264 All fit statistics should be simultaneously considered when assessing the adequacy of  
265 the models to the data.

266

267 **Results:**

268

269 The demographic characteristics of TARCC’s sample are presented in Table 1.

270

271 Base model fit was excellent (CFI = 0.98, RMSEA = 0.02). All behaviors loaded  
272 significantly on *p*. The *ad hoc* (+) and (-) factors were significantly indicated by their  
273 respective BPSD. The base model had improved fit over all alternatives.

274

275 The base model's three BPSD factors,  $p$ , (+) and (-), were regressed onto baseline  
276 psychometric performance. Model fit was again excellent (CFI = 0.98, RMSEA = 0.03).  $\delta$   
277 was strongly associated with  $p$ , (+) and (-). All three associations were inverse (adverse).  
278 Independently of  $\delta$ , MEM was uniquely associated with (+), while ECF was associated  
279 with (-). Both associations were moderately strong. ECF was also weakly associated  
280 with  $p$ .

281

282 **Discussion:** This analysis demonstrates a global BPSD factor's relatively good fit to  
283 observed BPSD and  $p$ 's statistically strong association with dementia severity as  
284 measured by  $\delta$ . Additionally, MEM was associated specifically with (+), while ECF was  
285 associated with (-), and with dementia.

286

287 Since  $\delta$  and  $g$  are both "indifferent to their indicators", they manifest in a wide range of  
288 cognitive performance measures. We have demonstrated  $\delta$ 's psychometric stability  
289 across batteries, and even down to the item-set of an individual measure (33). The  
290 spectrum of CNS-variables impacted by  $\delta$  and  $g$  may extend beyond cognition, into  
291 sensory or even motor function. Spearman himself constructed a  $g$  homolog from  
292 sensory discrimination tasks alone (9).

293

294 Those findings appear to constrain  $\delta$ 's (*and therefore dementia's*) biomarkers to those of  
295 "intelligence" (Caveat: Since  $g$  is manifest in *all* cognitive performance measures and  
296 possibly in sensory and motor domains, "intelligence" in this context cannot be construed  
297 as meaning "cleverness", "rationality" or "wisdom". Spearman's use of the word is limited  
298 to a unique mathematical association, demonstrable by factor analysis). Dementia's true

299 biomarkers must be similarly positioned to impact *every cognitive performance measure*.

300 Regional pathologies are disadvantaged in this regard.

301

302 The present findings suggest a similar constraint may relate to BPSD. Global  
303 psychopathology (i.e.,  $p$ ) may relate to the globally distributed processes that impact  $g$   
304 through  $\delta$ . Domain-specific behavioral constructs, orthogonal to  $p$ , seem more likely  
305 have regional determinants (34-35). This is consistent with our findings that MEM is  
306 related to (+) but not (-), while ECF is related to (-) and not (+). MEM might be plausibly  
307 associated with regional mesio-temporal pathology while ECF can be plausibly  
308 associated with regional frontal circuit pathology. Replication of this analysis by the dT2A  
309 homolog in ADNI (14) might allow for confirmation of such hypotheses against structural  
310 and functional neuroimaging.

311

312 The possibility of a dementia-specific dysbehavioral syndrome was alluded to by  
313 Hughlings Jackson in his 1884 description of the “dissolution” of the central nervous  
314 system (CNS) (36). He argued for a hierarchical loss of neurological integrity that would  
315 disrupt higher abilities and thereby “release” lower centers from control.

316

317 “I submit that disease only produces negative mental symptoms  
318 answering to the dissolution, and that all elaborate positive mental  
319 symptoms (illusions, hallucinations, delusions, and extravagant conduct)  
320 are the outcome of activity of nervous elements *untouched by any*  
321 *pathological process*” (emphasis added). -Hughlings Jackson, 1884

322 Jackson further described “uniform” and “local” dissolutions. “In uniform dissolution the  
323 whole nervous system is under the same conditions or evil influence, the evolution of the  
324 whole nervous system is comparatively evenly reversed.” He recognized that local

325 pathologies arise from distinct etiologies and that “Different kinds of insanity are different  
326 local dissolutions of the highest centres.” This suggests that the behaviors arising from  
327 global CNS disturbances might be a transdiagnostic property of dementing illness. The  
328 regional disruptions unique to each dementing illness might engender diagnostically-  
329 specific behavioral features, but those would not present transdiagnostically.

330

331 In this scenario, a global dysbehavioral syndrome would emerge in demented states  
332 regardless of their etiology(ies) and in response to transdiagnostic pathology, not  
333 disease-specific changes. Support for transdiagnostic dementia-specific behavioral  
334 features is provided by the stereotyped natural history of BPSD at specific stages of  
335 dementia’s evolution (37), the transdiagnostic presentation of multiple BPSD (38-39) and  
336 high penetrance of BPSD with increasing dementia severity (40). Support for a global vs.  
337 “local” BPSD dichotomy can also be intuited in recent work on the bifactor nosology of  
338 psychopathology in children and adults. Factor analyses of behavioral psychopathology  
339 suggest independent effects of both global and domain-specific behavioral factors on  
340 observed psychopathology (8).

341

342 Our model also suggests the potential for a novel *rational approach* to the treatment of  
343 BPSD. BPSD arising from regional pathology(ies) and manifesting as domain-specific  
344 behavioral issues may respond to “regional” pharmaco-biological interventions. BPSD  
345 manifesting as  $p$ -related behavioral issues may require “global” interventions and /or  
346 interventions directed at  $\delta$  and its biomarkers.

347 Examples of regional interventions might include many traditional monoaminergic  
348 approaches. Monoaminergic networks arise in the brainstem and project to regionally  
349 precise targets in the neocortex and associated subcortical structures (41). They do not  
350 project globally throughout the brain. Examples of monoaminergic interventions for

351 BPSD might include atypical antipsychotics and Serotonin Selective Reuptake Inhibitor  
352 (SSRI) antidepressants. Even-the pro cholinergic cholinesterase inhibitors are reported  
353 to have efficacy against certain BPSD (42). More precisely localized regional  
354 interventions would include regional lobotomy, deep-brain stimulation of specific  
355 structures (e.g., the amygdala), and /or regional transcranial magnetic stimulation  
356 (rTMS). All have been advocated for BPSB and related psychobehaviors in the literature  
357 (43).

358

359 In contrast,  $\gamma$ -aminobutyric acid (GABA) and glutamate are ubiquitously distributed, as  
360 are the effects of hypoglycemia, seizure disorders, whole brain radiation, and possibly  
361 blast-related traumatic brain injuries (TBI). Alcohol (EtOH) and benzodiazepines (BNZ)  
362 may have GABA-mediated adverse effects on behavior and cognition manifesting as  
363 changes in  $g$ ,  $\delta$  and  $p$ . The protean impacts of those insults beyond cognition and  
364 behavior, *including also balance, sensory and motor performance* may betray effects on  
365  $g$ ,  $\delta$  and  $p$ . Thus, the BPSD-related to  $g$ ,  $\delta$  and  $p$  may respond better to global  
366 interventions, e.g., mood stabilizing anticonvulsants, lithium, and or electroconvulsive  
367 therapies (ECT). Alternatively,  $g$ ,  $\delta$  and  $p$  might be adversely impacted by interventions  
368 of this class, explaining the insalubrious reputation of BNZ and EtOH in cognitively  
369 impaired persons.

370

371 In summary, we have specifically associated general psychopathology ( $p$ ) with a latent  
372 dementia severity metric ( $\delta$ ) derived from general intelligence ( $g$ ). This is  $p$ 's first  
373 demonstration in an elderly sample and the first to distinguish the global behavioral and  
374 psychological symptoms *specific to dementia* (BPSSD) from behavioral disturbances  
375 arising by way of non-dementing, albeit disease-specific processes affecting domain-

376 specific cognitive and behavioral constructs. Our findings call into question the utility of  
377 proposed regional interventions in BPSSD, and point to the need to explore global  
378 interventions against dementia-specific behavioral features.

379

380

381

382

383



384 **Table 1: Descriptive Statistics**

385

| <b>Variable</b>                     | <b>N</b> | <b>Mean (SD)</b> |
|-------------------------------------|----------|------------------|
| <b>Age</b> (observed)               | 3381     | 70.88 (9.48)     |
| <b>CDR (Sum of Boxes)</b>           | 3306     | 2.42 (3.35)      |
| <b>EDUC</b> (observed)              | 3381     | 13.24 (4.25)     |
| <b>Ethnicity</b> (1 = MA, n = 1189) | 3381     | 0.36 (0.47)      |
| <b>GDS<sub>30</sub></b> (observed)  | 3005     | 5.60 (5.25)      |
| <b>Gender</b> (♂ = 1, n = 1281)     | 3312     | 0.39 (0.49)      |
| <b>IADL (Summed)</b>                | 3381     | 10.48 (4.52)     |
| <b>MMSE</b>                         | 3311     | 25.52 (4.76)     |
| <b>Complete Cases</b>               | 2861     |                  |

386

387 CDR = Clinical Dementia Rating scale; COWA = Controlled Oral Word Association Test;  
388 DIS = Digit Span Test; GDS = Geriatric Depression Scale; IADL = Instrumental Activities  
389 of Daily Living; MMSE = Mini-mental State Exam; SD = standard deviation; WMS LM II =  
390 Weschler Memory Scale: Delayed Logical Memory; WMS VR I = Weschler Memory  
391 Scale: Immediate Visual Reproduction.

392

393

394

395  
396  
397

**Table 2: Model Fit**

| <b>Alternative Models</b>                                     | <b>CHISQ</b> | <b>df</b> | <b>CFI</b> | <b>RSMEA</b> | <b>ACC</b> |
|---------------------------------------------------------------|--------------|-----------|------------|--------------|------------|
| 1 $p$ only                                                    | 551.55       | 54        | 0.92       | 0.05         | 623.55     |
| 2 Hierarchical                                                | 463.32       | 52        | 0.93       | 0.05         | 539.32     |
| 3 Conventional (no $p$ ) [REF]                                | 2677.81      | 53        | 0.58       | 0.12         | 2751.81    |
| 4 Orthogonal bifactor<br>[ $p$ , (+), (-) ( <b>Figure 1</b> ) | 196.35       | 42        | 0.98       | 0.03         | 292.35     |

398

399 **Figure 1: Bifactor CFA of BPSD**

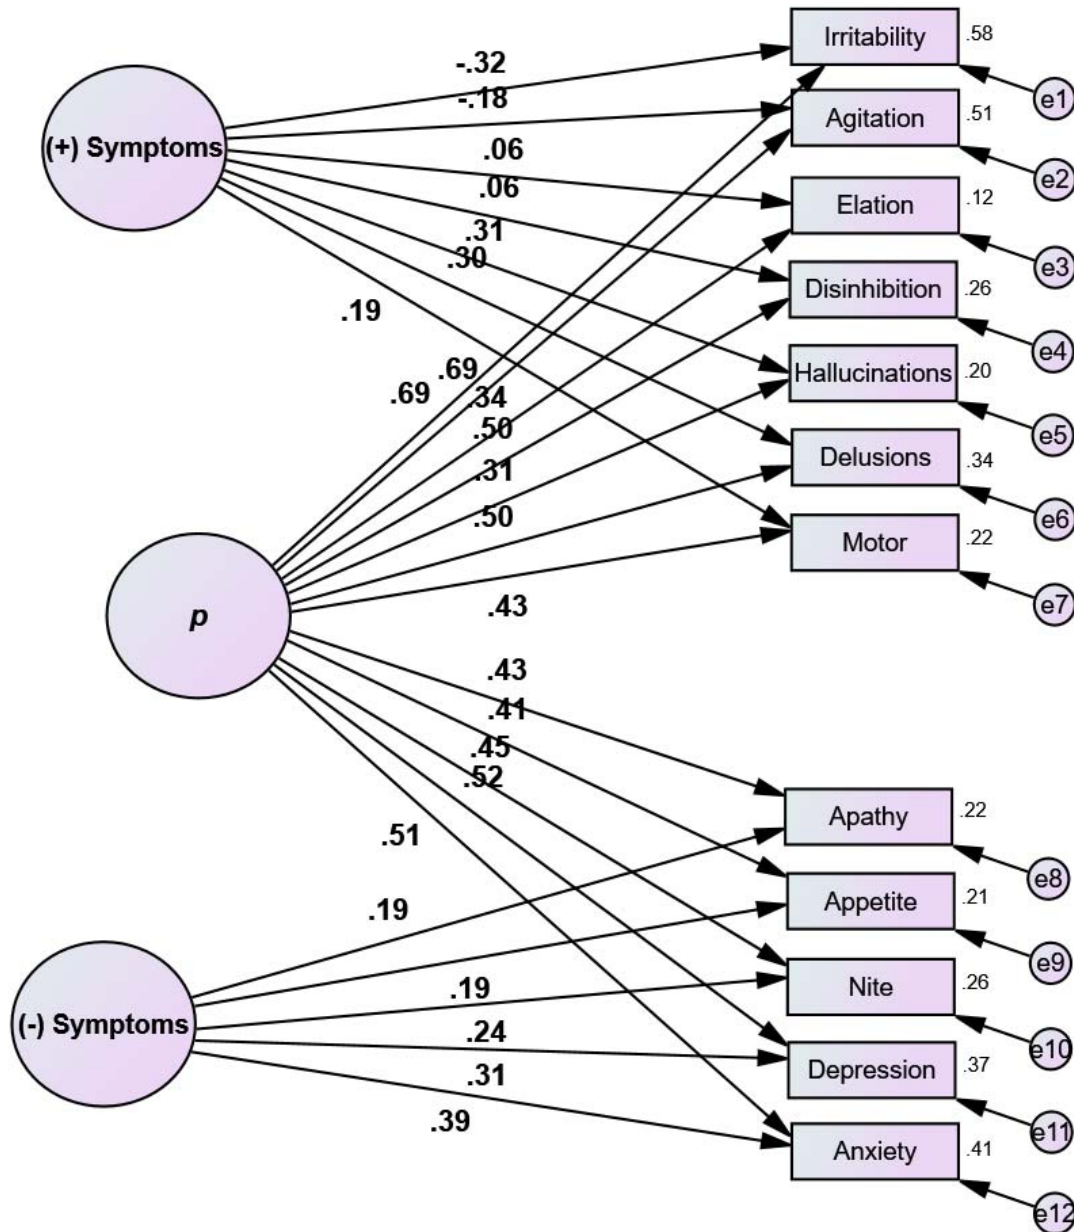

**TARCC Data**  
**Model Fit:**  
**CHI SQ = 196.348**  
**CFI = .975**  
**RMSEA = .032**

400  
 401  
 402  
 403  
 404  
 405  
 406  
 407

Index; BPSD = Behavior and Psychological Symptoms of Dementia; CFA = Confirmatory Factor Analysis; GDS = Geriatric Depression Scale; HCY = serum homocysteine; HgbA1c = serum hemoglobin A1c; RMSEA = Root Mean Square Error of Association.

\*All observed variables except APOE are adjusted for age, education, ethnicity, gender, GDS, HCY, and HgbA1c (paths not shown for clarity). Those covariates are densely intercorrelated.

408 **Figure 2: dDx is Strongly Associated with *p***  
 409

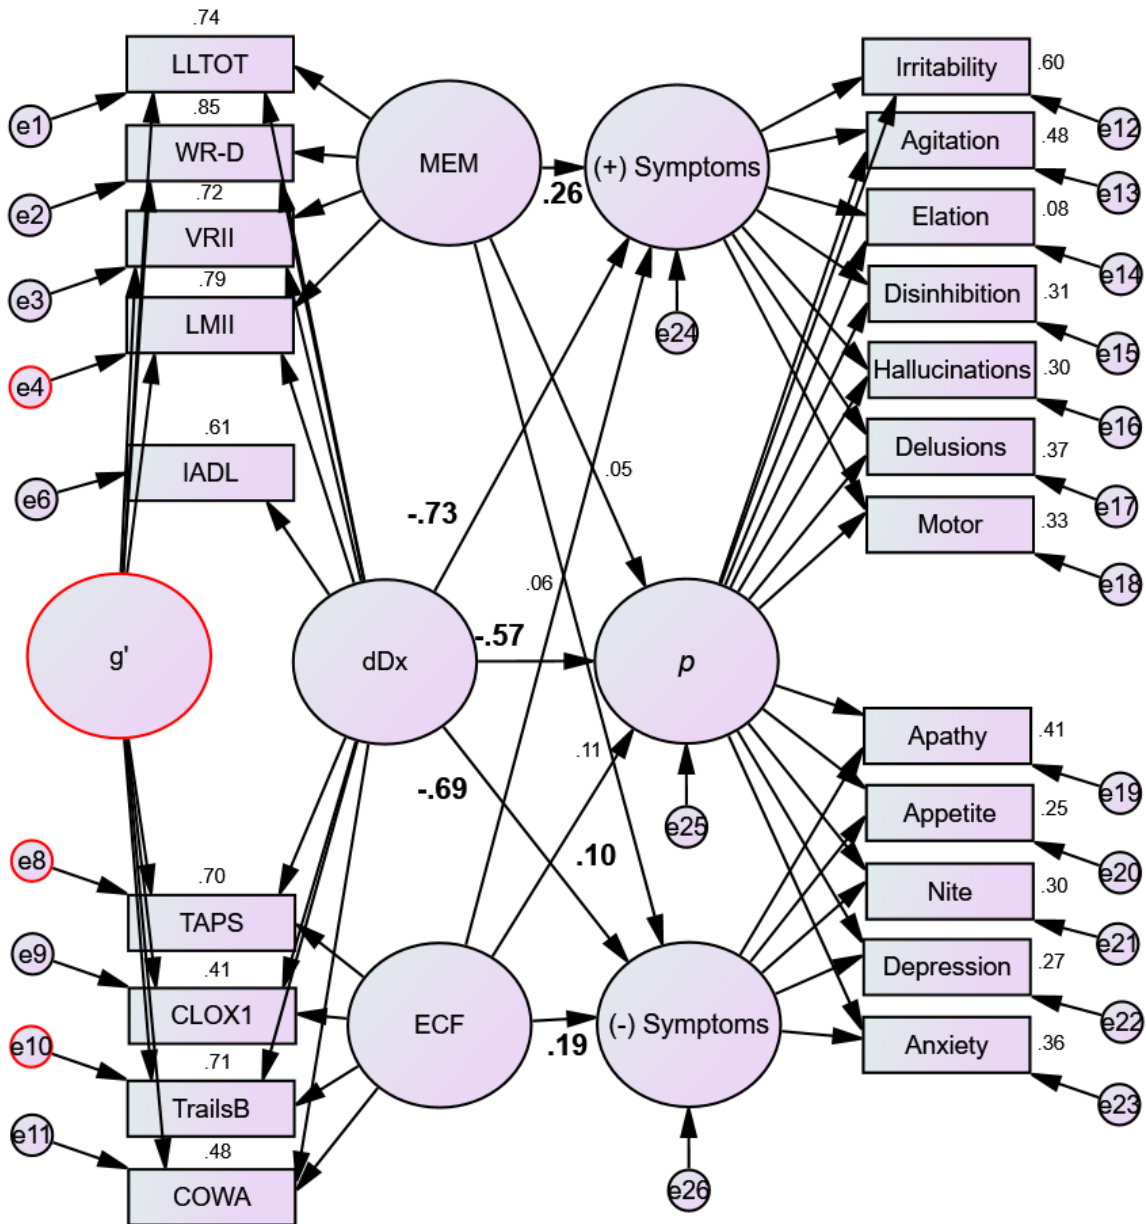

**TARCC Data**  
**Model Fit:**  
**CHI SQ = 626.771**  
**CFI = .976**  
**RMSEA = .029**

410  
 411  
 412  
 413  
 414  
 415

Index; GDS = Geriatric Depression Scale; HCY = serum homocysteine; HgbA1c = serum hemoglobin A1c; RMSEA = Root Mean Square Error of Association.

\*All observed variables except APOE are adjusted for age, education, ethnicity, gender, GDS, HCY, and HgbA1c (paths not shown for clarity). Those covariates are densely intercorrelated.

416 **References:**

417

418 1. Feast A, Moniz-Cook E, Stoner C, et al: A systematic review of the  
419 relationship between behavioral and psychological symptoms (BPSD) and  
420 caregiver well-being. *Int Psychogeriatrics* 2016; 28:1761-1774

421

422 2. Nobili A, Pasina L, Trevisan S, et al: Use and misuse of antipsychotic  
423 drugs in patients with dementia in Alzheimer special care units. *Int Clin*  
424 *Psychopharmacol* 2009; 24:97-104

425

426 3. Murman DL, Chen Q, Powell MC, et al: The incremental direct costs  
427 associated with behavioral symptoms in AD. *Neurology* 2002; 59:1721-1729

428

429 4. de Oliveira AM, Radanovic M, de Mello PC, et al: Nonpharmacological  
430 Interventions to Reduce Behavioral and Psychological Symptoms of Dementia: A  
431 Systematic Review. *Biomed Res Int* 2015; 2015:218980

432

433 5. Toot S, Swinson T, Devine M, et al: Causes of nursing home placement for  
434 older people with dementia: a systematic review and meta-analysis. *Int*  
435 *Psychogeriatrics* 2017; 29:195-208

436

437 6. Lahey BB, Applegate B, Hakes JK, et al: Is there a general factor of  
438 prevalent psychopathology during adulthood? *J Abnormal Psychol* 2012;  
439 121:971–977

440

- 441 7. Caspi A, Houts RM, Belsky DW, et al: The  $p$  factor: One general  
442 psychopathology factor in the structure of psychiatric disorders? Clinical  
443 Psychological Science 2014; 2:119–137  
444
- 445 8. Caspi A, Moffitt TE. All for One and One for All: Mental Disorders in One  
446 Dimension. Am J Psychiatry 2018; 175:831–844  
447
- 448 9. Spearman C. General intelligence, objectively determined and measured.  
449 Am J Psychology 1904; 15:201-293  
450
- 451 10. Royall DR, Palmer RF, O'Bryant SE. Validation of a latent variable  
452 representing the dementing process. J Alzheimer's Dis 2012; 30:639–649.  
453
- 454 11. Royall DR, Palmer RF. "Executive functions" cannot be distinguished from  
455 general intelligence: Two variations on a single theme within a symphony of latent  
456 variance. Front Behav Neurosci 2014; 9:1-10  
457
- 458 12. Royall DR, Palmer RF.  $\delta$  scores identify subsets of "Mild Cognitive  
459 Impairment" with variable conversion risks. J Alzheimer's Dis 2019; 70:199-210  
460
- 461 13. O'Bryant SE, Waring SC, Cullum CM, et al. for the Texas Alzheimer's  
462 Research Consortium. Staging dementia using Clinical Dementia Rating Scale  
463 Sum of Boxes scores: A Texas Alzheimer's research consortium study. Arch

464 Neurol, 2008; 65:1091-95

465

466 14. Royall DR, Palmer RF. A  $\delta$  homolog for dementia case finding with  
467 replication in Alzheimer's Disease Neuroimaging Initiative. J Alzheimer's Dis 2019;  
468 67:67-79

469

470 15. Palmer RF, Royall DR. Future dementia status is almost entirely explained  
471 by the latent variable  $\delta$ 's intercept and slope. J Alzheimer's Dis 2016; 49:521-529

472

473 16. Gavett BE, Vudy V, Jeffrey M, et al: The  $\delta$  latent dementia phenotype in the  
474 NACC UDS: Cross-Validation and Extension. Neuropsychology 2015; 29:344-352

475

476 17. John SE, Gurnani AS, Bussell C, et al: The Effectiveness and Unique  
477 Contribution of Neuropsychological Tests and the  $\delta$  Latent Phenotype in the  
478 Differential Diagnosis of Dementia in the Uniform Data Set. Neuropsychology.  
479 2016; 30: 946–960

480

481 18. Waring, S., O'Bryant, S.E., Reisch, J.S., et al, for the Texas Alzheimer's  
482 Research Consortium. The Texas Alzheimer's Research Consortium longitudinal  
483 research cohort: Study design and baseline characteristics. Texas Pub Health J  
484 2008; 60:9-13.

485

- 486 19. Arbuckle JL. Analysis of Moment Structures-AMOS (Version 7.0)  
487 [Computer Program], SPSS, Chicago, 2006  
488
- 489 20. Kaufer DI, Cummings JL, Ketchel P et al: Validation of the NPI-Q, a brief  
490 clinical form of the Neuropsychiatric Inventory. *J Neuropsychiatry Clin Neurosci*  
491 2000; 12:233-239.  
492
- 493 21. Acevedo A, Krueger KR, Navarro E, et al: The Spanish translation and  
494 adaptation of the Uniform Data Set of the National Institute on Aging Alzheimer's  
495 Disease Centers. *Alzheimer Dis Assoc Disord* 2009; 23:102–109.  
496
- 497 22. Sayegh P, Knight BG: Functional assessment and neuropsychiatric  
498 inventory questionnaires: measurement invariance across Hispanics and non-  
499 Hispanic whites. *Gerontologist* 2014; 54:375–386.  
500
- 501 23. Folstein MF, Folstein SE, McHugh PR. Mini-mental state: a practical method for  
502 grading the cognitive state of patients for the clinician. *J Psychiatric Res* 1975; 12:189-  
503 198  
504
- 505 24. Hughes, C.P., Berg, L., Danziger, W.L., Coben, L.A., Martin, R.L. (1982). A  
506 new clinical scale for the staging of dementia. *British Journal of Psychiatry*. 140,  
507 566-572.  
508  
509



- 510 25. Yesavage JA, Brink TL, Rose TL, et al: Development and validation of a geriatric  
511 depression screening scale: A preliminary report. *J Am Geriatric Soc* 1982; 29: 164-171  
512
- 513 26. Hollingworth P, Hamshere ML, Moskvina V, et al: Four components describe  
514 behavioral symptoms in 1,120 individuals with Late-Onset Alzheimer's Disease. *J Am*  
515 *Geriatric Soc* 2006; 54:1348–1354  
516
- 517 27. Palmer RF, Royall DR. Missing data? Plan on it! *J Am Geriatric Soc.* 2010;  
518 58:S343-348  
519
- 520 28. Schafer JL, Graham, JW Missing data: Our view of the state of the art. *Psychol*  
521 *Methods* 2002; 7:147–177  
522
- 523 29. Bollen KA, Long JS. Testing Structural Equation Models. Sage Publications,  
524 Thousand Oaks, CA., 1993  
525
- 526 30. Bentler PM. Comparative fit indexes in structural models. *Psychol Bull* 1990;  
527 107:238–246.  
528
- 529 31. Wheaton B, Muthén B, Alwin DF, et al: Assessing reliability and stability in panel  
530 models. In D.R.Heise (Ed.) *Sociology Methodology* San Francisco, CA: Jossey-Bass,  
531 1977  
532

- 533 32. Browne M, Cudeck R. Alternative ways of assessing model fit. In Testing  
534 structural equation models, Bollen KA, Long JS, eds. Sage Publications, Thousand  
535 Oaks, CA, pp. 136–162, 1993  
536
- 537 33. Royall DR, Palmer RF, Matsuoka T, et al: Greater than the sum of its parts:  $\delta$  can  
538 be constructed from item level data. J Alzheimer's Dis 2016; 49:571-579  
539
- 540 35. Bruen PD, McGeown WJ, Shanks MF, et al: Neuroanatomical correlates of  
541 neuropsychiatric symptoms in Alzheimer's disease. Brain 2008; 131:2455-2463  
542
- 543 35. Jellinger KA. Cerebral correlates of psychotic syndromes in neurodegenerative  
544 diseases. J Cell Mol Med 2012; 16:995-1012  
545
- 546 36. Jackson JH. Evolution and Dissolution of the Nervous System. In *Selected*  
547 *Writings of John Hughlings Jackson. Volume 2. Various Papers, Addresses and*  
548 *Lectures*. Arch Neuropsychiatry 1932; 28:967.  
549
- 550 37. Jost BC, Grossberg GT. The evolution of psychiatric symptoms in  
551 Alzheimer's disease: a natural history study. J American Geriatrics Soc. 1996;  
552 44:1078-1081.  
553
- 554 38. Thompson C, Brodaty H, Trollor J, et al: Behavioral and psychological  
555 symptoms associated with dementia subtype and severity. Int Psychogeriatrics.  
556 2010; 22:300-3005  
557

558 39. Kazui H, Yoshiyama K, Kanemoto H, et al: Differences of Behavioral and  
559 Psychological Symptoms of Dementia in Disease Severity in Four Major  
560 Dementias. PLoS One 2016; 11:e0161092

561

562 40. Aalten P, de Vugt ME, Jaspers N, et al: The course of neuropsychiatric  
563 symptoms in dementia. I. Findings from the two-year longitudinal Maasbed study.  
564 Int J Geriatrics 2005; 20:523–530.

565

566 41. Hoffman BJ, Hansson SR, Mezey E, et al: Localization and dynamic regulation of  
567 biogenic amine transporters in the mammalian central nervous system. Front  
568 Neuroendocrinol 1998; 19:187-231

569

570 42. Lanari A, Amenta F, Silvestrelli G, et al: Neurotransmitter deficits in behavioural  
571 and psychological symptoms of Alzheimer's disease. Mech Ageing Dev 2006; 127:158-  
572 165

573

574 43. Staudt MD, Herring EZ, Gao K, et al: Evolution in the treatment of psychiatric  
575 disorders: From psychosurgery to psychopharmacology to neuromodulation. Front  
576 Neurosci 2019; 13:108

577

578

579

580

581

582

583

584  
585
